# Supplementary material for: Meeting the Challenge of Viral Disease Management in the US Wine Grape Industries of California and Washington: Demystifying Decision Making, Fostering Agricultural Networks, and Optimizing Educational Resources
Source: Hindawi journal article supplement (doi:10.1155/2023/7534116), 2023-06-07
Supplement: f1 [file 7534116.f1.docx]

**SUPPLEMENTAL DATA FILE**

Table 1. Summary of management practices for grapevine leafroll and red blotch diseases.

| **Practice** | **Description** |
| --- | --- |
| Plant Material | Source certified plant material to reduce the risk of introducing the viruses to a newly planted vineyard. May include additional measures such as diagnostic assays or consultants to provide additional screening. |
| Diagnostic assays | Diagnostic assays to detect the presence of the viruses in vines under production (nursery) or in newly planted or established vineyards. |
| Vine Removal and Replacement | Rogue & Replant: Remove symptomatic vines individually and replant with new vines. Healthy vines are left in place.  Redevelop: Large-scale removal of the entire vineyard or block (healthy and diseased vines) and replant with new vines. |
| Vector Management | Leafroll disease: suppress mealybug populations with insecticides, biological control (predators & parasitoids), and mating disruption. Predominant mealybug species in WA is grape (*Pseudococcus* *maritimus*) and in CA is grape and vine (*Planococcus ficus*). Mating disruption and parasitoid releases are for vine mealybug only.  Red blotch disease: vegetation management to reduce habitat for *Spissistilus festinus*. |
| Detection & Mapping | Scouting, mapping, and marking vines with characteristic visual disease symptoms.  Use of imaging technology to detect and map vines with disease symptoms.  Monitor vector populations with pheromone-baited traps (mealybugs) or yellow panel traps (*S. festinus*). |
| Replanting & Redevelopment | Residual root removal during redevelopment.  Manage mixed age plantings (replanted vines in established vineyards): Modify irrigation system by installing a 2nd drip line to deliver additional water to replanted vines. Replants require additional labor to prune and train. |

Table 2. Core open-ended questions asked in part 1 of interviews.

| **No.** | **Core Question** |
| --- | --- |
| 1 | What strategies have you adopted in your vineyard(s) to control leafroll? |
| 2 | Did your vineyard start taking action against leafroll before or after you started to work with them? |
| 3 | What do you see as the economic challenges for controlling leafroll? |
| 4-6 | Questions 1 to 3 repeated for red blotch |
| 7 | Do you think that the industry is missing information about how to control leafroll? (Is there a Knowledge Gap - are you missing critical information for management?) |
| 8 | Question 7 repeated for red blotch |
| 9 | Do you think there are any hurdles within your company, other than money, that may stop you from implementing leafroll/red blotch strategies? |
| 10 | Do you think there are any hurdles outside of your company that has made it harder to implement management strategies for leafroll/red blotch? (e.g., neighboring vineyards, regulations, industry standards, etc.) |
| 11 | Are you (or any vineyards that employ you) part of a regional group that aims to manage leafroll and/or red blotch? |
| 12 | Do you think that Government/industry standards support your efforts to reduce leafroll/red blotch (i.e., certified nursery stock, nursery standards versus government standards, regulation on pesticide use)? |

**THEME ANALYSIS EXAMPLE QUOTES**

Table 3. Example quotes for theme 1: costs of practices.

| **Economy of practice vs. large-scale replanting** |
| --- |
| “[Virus testing is] not as expensive as it is to replant. The longevity of those vineyards is more important than a few costly tests…for us it's not an issue with paying for the testing, we’ve done the expensive replanting and we don’t want to do it ever again”.  “You know the cost of controlling vectors is not that much when you think of pulling out mature vines and replanting new certified clean vines and trying to get those clean and trying to get them into production”. |
| **Vineyard site-specific aspects** |
| Available Financial Resources: “We have a client that we like try to farm them as cheap as possible, whereas the other ones are more high-end…they have the money to help control [spread]”.  Organic or conventional farming practices: “I know people who have done it organically and I know they’ve released predators [of vine mealybug] which is so costly, but they don’t have any organic pesticide…they were also lucky that they had that huge pool of money that they could spend on it”.  Rapid rates of disease spread or elevated disease pressure: [Roguing] depends on the number…in St. Helena…maybe 400 vines this year that we flagged as red blotch, those will get pulled out. We have a vineyard in Stags Leap area, and I think they counted 1500 vines, we’re not going to rogue those. It’s not worth it. We’re going to keep farming it until it gets to a threshold level where we can’t make decent wine from it and then we’ll pull it out”.  Cost and logistics of farming mixed-age vineyards: “[after roguing] if your vineyard isn’t set up with separate irrigation valves to be able to water old and young vines in the same row, that’s hard…It takes more time in a vineyard of mixed ages to train it. It’s a separate task to go train up those vines, fertilize them separately…that is an economic challenge for sure”.  Compatibility with mechanization: [after roguing] “it’s hard to retrain [replacement] vines because at that point [after 3 years] our full mechanization regime is in place and it’s really unfriendly on young vines”.  A reluctance to remove heritage vines: “I think that’s our impotence when you have one of those heritage vineyards, it’s one of the oldest left in Napa Valley and we’re not going to pull it out just because of virus. So, we manage it and understand that it might spread between blocks”. |
| **Labor costs and availability** |
| “Labor is a huge portion…We have to pull out the vines by hand...and then when we replant...in the planting hole itself we put bone meal and compost and a carton; you think about that. If you’re replanting 300- 700 vines...it normally takes a crew of 4 to 5 people, 2 to 3 weeks in total...They also have to re-punch [irrigation] emitters and hang drip hose and then we try to grow the rootstock out for two years before we bud it over. But then - in total to rogue one vine - the care that is accrued over the next three years is extremely labor intensive and very costly. I think that we are lucky that we can do this rather than just being able to bring in the bulldozer and get rid of this entire block”.  “What is the cost [of virus management]? How much does it cost to scout a program regularly and send in X number of virus tests per year? What does it cost to scout vines, mark them, rogue them, replant them, have a crew come through and do training passes on all those replanted vines...the cost of irrigation stuck in by those young vines? There are a lot of dollar signs in these practices, and I think people just get overwhelmed and say that is too expensive or I don’t have the time and labor to do that” |

Table 4. Example quotes for theme 2: production demand.

| **Reduced yields** |
| --- |
| Lower yields drive adoption of practices:“…we always hope to keep these vineyards in as long as we can…30 years is what we aim for and it seems like with these virused [sic] vineyards, we are getting maybe 20 at best…that’s really where the expense comes in…$30,000 to $40,000 to replant an acre and you don’t get production for three years…it’s basically an economic issue with losing a…percentage of production”.  Adoption lags when yields viable: “I had a client in Russian River who[se]…way was to get big tons and sell it at a lower price…he had a vineyard that had a lot of virus in it and he just was, you know, I’m selling fruit and why would I do it [control leafroll and red blotch]?”. |
| **Grape prices** |
| “…you have to take into consideration what price per ton you are actually selling it. [There is] an economic threshold. Does it even make sense to rogue or remove a whole block or just keep producing?”.  “…our fruit costs are really relatively low to our bottle prices [so] we have the ability to do more things than most people do. Like pulling out vineyard blocks just because it’s qualitatively a problem”.  “In white grapes…the price per ton is so low that no one cares or does anything…Chardonnay is $2,600 to $2,800 a ton…Napa Cab $8,000 a ton…Almost all the Chardonnay I have worked with or seen has leafroll”. |
| **Industry-wide demand** |
| “Because Washington was in such a boom for so many years there wasn’t nearly enough fruit and when you need to plant 5,000 acres in a year, ultimately people compromise on the health and quality of planting stock, so I think some bad decisions were made because of urgency in trying to fulfill winery needs”.  “…so, there is all of a sudden a glut of grapes and wine and there are 20-year-old blocks that just aren’t getting adequately ripe…so it is pushing the growers to spend a little more to make sure they do it right this time”. |
| **Risk assessments** |
| California Central Coast: “I’m concerned where we’re planting 3rd generation vineyards in the past 3 to 4 years that if these brand-new ones succumb to red blotch that they won’t be vineyards anymore. I mean you can’t keep planting grapes if you can’t make them grow, you’re going to have to grow something else”.  Washington State: “The red blotch hasn’t seemed to spread in that block, so we have not done any roguing or anything in that block. We’ve known about it for 7 or 8 years and we’ve almost taken a hands-off approach and it doesn’t seem to be spreading”. |

Table 5. Example quotes for theme 3: product salability.

| **Impacted quality** |
| --- |
| “If it [red blotch] gets out of control then the winery won’t take the fruit and ultimately that’s the end game”.  “The wine makers absolutely love three or four of these old cab [V. vinifera cv. Cabernet Sauvignon] blocks that are just full of leafroll, and so wine making won’t let the company put in the capital plan to yank those blocks and start over”.  “I wanted to rip out the red blotch that was in the Yakima Valley as well, but I guess I kinda got trumped on that one because tonnage and quality was fine”.  “If we had a block where flavors were consistently bad, then we would get rid of that...but right now the areas that we have positively tested [with leafroll and red blotch], the fruit has maintained quality over time”. |
| **Market demand for fruit** |
| “…people say, oh yeah, we don’t want red blotch fruit [but] there’s just literally not enough supply of fruit down here for people to say that they absolutely won’t take red blotch fruit”.  “Locally I think it’s taken a glut of grapes and wineries demanding clean vines and saying your contract’s up if they’re out in your vineyard and notice a bunch of leafroll...I think ultimately it takes something like that to force any change”. |
| **Cultivar differences** |
| “[leafroll] delays fruit ripening in white varieties. We don’t care because we pick those earlier and there isn’t a ripening problem as much. It is mostly the red varieties that we care about”.  “With the whites we can tolerate leafroll and red blotch a lot easier than the reds. So unfortunately, some get old and diseased. I mean ideally we would pull all of it out once its diseased but that’s just not possible so the white ones we will hold on to longer and the reds will become more of a priority to replant. [Researcher: *Is it because it doesn’t affect the quality so much?*]Yes”.  “I think from a wine making standpoint, I don’t think leafroll is as big in white varieties as in red because we pick white varieties earlier. They don’t have issues really with ripening like the…red grapes do. So…I think it’s a different management strategy between red and whites”. |

Table 6. Example quotes for theme 4: decision-maker knowledge and experience.

| **Disease Ecology** |
| --- |
| Inability to detect mealybug vectors: “Some people still don’t really know how to scout for mealybugs or that they could put up pheromones or traps for the males and how to actually count those traps and how to use that information, where to put them…and also to be certain that if you don’t pull out your vines…how fast it [leafroll] can really increase”.  Poor knowledge in decision-making group: “There’s just a disconnect with some owners...an owner [may have] no idea how [their] vineyards are being managed…they’re not going to know or understand. The way you propose [disease management] is pretty delicate. It’s like you’re accusing someone of being sick”.  “Some wine makers romanticized wines from the 70s where vineyards were mostly virused…there was an idea that we should be embracing a little bit of virus…I was like, that might work [with leafroll-associated virus 2] …but with red blotch and when you see it increasing, I was pushing pretty hard to get back on the roguing program”.  Inefficient roguing protocols: “We had a really bad site in Carneros where there was really high [red blotch] incidence. It was just poorly decided management practices...we kind of rogued out a south section, replanted and then one or two years later they decided to…replant the entire vineyard”.  Challenges of visual identification: “There can be issues with flagging vines and just having a well-educated crew...knowing how to properly identify leafroll and red blotch. Last year there was an issue because…it was hard to tell the difference between potassium deficiency and red blotch or leafroll”.  Confusion over certified plant material: “The average experienced person does not understand how certified material is made. Like understanding the differences between a foundation block, a mother block, certified material…There’s a lot of people who believe if they buy material from a certified nursery that it’s all certified, but that’s not the case”.  Inappropriate use of products: “[Some growers] …spray shit with potassium on it…that’s the worst place to spend your money…I have to rein my managers in from what I call the ‘active no management’ [strategy] that makes them feel good because they did something but it’s not going to fix the problem”. |
| **Ability to quantify disease & vector incidence** |
| Vector management hampered by challenge of detecting sessile mealybugs: “My scout spends tons of time peeling bark [scouting for vine mealybug] …[but] we have so many acres to go over…in 2018 our [vine mealybug] populations got out of control…by the time we saw it, it was something that was already coming out of the bark, and it was too late for us”.  Diagnostic assays used to overcome the challenge of visual symptom identification: “We test a portion of the vines every year both the ones that we mark [visually ID] and then some that we don’t. For the most…they [scouts] mark…has either leafroll or red blotch…The problem is that some of the ones…that we don’t mark sometimes show up diseased. I don’t think it’s their fault, I think it’s just asymptomatic vines”.  “...we go out and flag every year. We get a count; we’ll...sample, do composite samples... within a block and send them out for analysis and if we get back red blotch or leafroll then, well, it just kind of confirms [our visual assessments]. So usually, what’s flagged...red is dead”.  “We just took over a vineyard…it had these new vines that were just bright red…and looked just like leafroll…I took five samples from 5 unique plants and all of them came back negative. In doing further research, it was actual mechanical damage and also voles were eating them”.  Roguing hindered by inability to visually assess or assay every vine: “It can take a few years for the symptoms to show up. Some people…would go out to test what looked like clean vines…but it's hard because you can’t test every single vine in a large planting. So, a lot of people just waited to see if the symptoms would just show up”. |

(Table 6 continued)

| **Experience using practices** |
| --- |
| Experiences specific to Leafroll: “I think that I have all the resources at my disposal at this point up to and including removing blocks…we’ve removed the worst blocks and rogued out most of those blocks where we are seeing...spread. We’re not really spending a lot of money on leafroll management like we were ten years ago”.  “[Movento (insecticide) is] very effective…although it doesn’t eradicate them. If we use mating disruption and biologicals [predators or parasitoids]…there’s…not enough [vine mealybug] to stop the harvest but it leaves a higher population…than in the chemically treated blocks…I only have organic growers doing it because they want to market the fruit as organic”.  “We went ahead and committed to a full-blown rogueing program...we went from [removing] 1000 to removing…150 the next year to removing 30 the next year to removing 20 last year and this year…I think we’ll remove 10”.  “I’ve seen good success stories…a vineyard that was planted in ‘92…they rogued every year, and they did a really good job of controlling the virus…and it was cool to see because the block up wind from there was riddled with virus maybe close to 100% but it was a white variety and they didn’t do that rogueing process”.  Experiences with leafroll versus with red blotch: “Over the past ten years there has been [a] pretty robust roguing protocol. We have been able to control red blotch disease via roguing, but we have seen it spread a lot in the past two years”.  “Leafroll there is gradients that you can manage it. It deteriorates over time. But you have to time to plan to take action and do stuff. Red blotch, you’re done. You can’t do anything. It is really unpredictable”.  “…when you go around and pull out leafroll you see it decline from season to season…whereas red blotch disease it seems like you can pull it out and you will see the same exact amount or maybe even more the next year…maybe pulling out vines is the wrong answer?”.  “I think they learned a little bit of a lesson from the leafroll virus…almost immediately it was like [do] whatever to get rid of it [red blotch], do whatever it takes to keep it from moving…we still don’t know what’s going on here in Washington and why it’s not moving…that’s a good thing for us at this point”. |

Table 7. Example quotes for theme 5: current scientific understanding.

| **Disease Ecology** |
| --- |
| “I think the biggest problem with red blotch as compared to leafroll is we don’t know how it’s vectored [transmitted]. So, it’s hard to have an effective strategy for controlling red blotch spread in the vineyard when you don’t know how it’s spread”.  “…we can’t go spraying our riparian areas for treehoppers so now what? I've heard that they’re still working on finding other potential vectors [for red blotch]...from what I've seen I feel there have to be other vectors…that research is very crucial because the nice thing is we know mealybug[s] are vectors of leafroll-3…I think that gives people some hope…they can be proactive, they have a chance of beating it [leafroll]”.  “With the current... identification of an uncontrolled outbreak of red blotch in the Russell Ranch vineyard [source of California Registered & Certified Grapevines at Foundation Plant Services, UC Davis (Arnold et al. 2019)] …that gets tested quite regularly and immediately rogued…in the face of their not being able the manage the spread, it has made me question how I can manage the spread of red blotch”.  “With red blotch you tell a client you have to replant, and they say: ‘great how do we not get that again?’, and…it’s hard to convince people of some of the economic outlays when it’s not clearly defined what you’re fighting”. |
| **Perceived knowledge gaps** |
| Poor understanding of red blotch vectors: “The biggest problem with red blotch as compared to leafroll is we don’t know how it’s vectored. So, it’s hard to have an effective strategy for controlling red blotch spread in the vineyard when you don’t know how it’s spread”.  “Digestible” economic models and digital calculators: “More…digestible economic models of like…if you replant a vineyard that has 10% Infection, you can expect that it will cost you this… much money in production but you save this much in spread, or dollar per vine…loss of wine quality, or years of production”.  Mitigation of insecticide resistance for mealybug: “I think the industry needs more information on the imidacloprid resistance issue and they need more information on alternative products because two of the better products are in the same mode of action class”.  New tools for detecting viruses: [Growers] need more information where leafroll and red blotch are potentially if they can’t see it, especially white varieties. That information might be delivered in the form of handheld tests, some way of going into a vineyard and determining right away if the vineyard and determining right away if the vineyard is impacted or not”.  Availability of mealybug-resistant rootstocks: “We have systems out there that are really useable for creating genetically improved plants…and is leafroll resistant and that is really what we should be doing”.  Additional control options for organic growers: “I wish there would be more that we could do organically with…more options essentially…I would really like to know you know what works organically and what doesn’t”.  Region-specific studies of disease management. Another thing I would say is how tested [a practice is] in my region is? So having information that is relevant…specific at least to my varieties and somewhere in the Salinas valley or in the San Luis Obispo area, somewhere on the central coast versus say only in Napa or only in the central valley. That kind of localized info really allows me to put some oomph behind…request[s] especially if it does cost money or requires operational changes. I can say ‘hey I have a very strong reason, this makes sense’”.  Evidence of effectiveness of new strategies: “There are a lot of new things people are trying to sell folks. Like imagery saying it can spot virus…people like to say: ‘oh yeah this will help with virus!’ And I just think we need more vetting and more conversation about what you can do about virus”. |

Table 8.Example quotes for theme 6: extension and outreach.

| **Extension educators** |
| --- |
| “It’s essential to have some kind of public researcher in each county”.  “We have a lot of good resources like I was saying in terms of local [extension] people that we know and trust. A lot of the managers call me and ask what has been new in UC, ASEV publications and so I try to stay up on that kind of stuff. I would say it is not comforting to know how many of the extension advisors in UC [University of California] are retiring and their positions are not getting refilled”.  “[One advisor has] got two counties, San Luis Obispo County and Santa Barbara…[They’ve] not only grapes to deal with [they’ve] got row crops…and nursery crops…[their] attention span for all intents and purposes is way, way, over stretched”. |
| **Quality of dissemination** |
| “We get it [need for planting certified stock] from WSU extension, Washington Wine Growers Association, we get it from Grape Society…we're kind of continually beaten over the head by it which is good. It has certainly decreased the viral load of the town here. I don’t see a lot of new vineyards with a lot of leafroll and red blotch symptoms which is good”.  “There is a lot of good information out there, but I think it needs a lot of condensing and processing to be more accessible for folks”.  “I think there needs to be more tools like…this is the type of grower you are so here’s some things to consider, here’s the cost of them…there is some of that out there but it’s not as accessible…as it could be…I still can’t name off the top of my head…optimal tissues and timings for testing of leafroll and red blotch. I have to look that stuff up; it always takes me a little digging. Frankly I shouldn’t have to…I have a lot of technical research on red blotch but not necessarily the resources I want at the field level”.  “I think there have been mixed messages about leafroll that like, yeah, it’s bad but what control measures make sense?”.  “There is a lot of mixed messaging…[extension] are doing great work but at the end of the day right now talking to you, you ask me to list the top 3 concerns of red blotch [and] I don’t have a really good go to thing to say…I don’t know what I would do in the same way as I can with leafroll”.  “I think there isn’t a lack of good info but translating it into [an] easy to digest…checklist...I hate saying it because I love [my extension agent] but a lot of our leafroll work and a lot of our red blotch work has come out of the north coast…I expect there to be regional conversations but there is also too much information out there that is very muddled up that I don’t necessarily think it is…as accessible…as it could be for maximum utilization”. |

Table 9. Example quotes for theme 7: organizational factors.

| **Decision-making processes** |
| --- |
| “[Upper management are] pretty involved being out in the vineyard seeing what’s going on. You know, listening to me [viticulturist] for twenty years we all [know]…where we are at and what we are trying to accomplish”.  “…it all depends on your company’s structure of trust. I think there could be more understanding in winemakers...it’s kind of hard because it depends on the size of your company because in big companies’ vineyard managers can make all those decisions, in small companies sometimes the winemaker is the person who makes that decision”.  “We are smaller scale we are more of a boutique winery and we go on vineyard tours with the wine makers and everyone gets an ATV and we go down the rows and we taste grapes and we’ll discuss after every block what we thought, taking notes...I do think in general…in California that [with] these large scale huge producers…the wine makers might not even know which vineyards have red blotch and which have fanleaf virus…they just see the grapes come in a truck and they crush everything and make wine”  "[as an organization], we are very sensitive to budgets. Particularly, my role in viticulture: I don’t necessary control the budget, I just have to advocate strongly that we need certain things”.  “…in my position I try to maintain an amount of autonomy and distance because I’m…spending a lot of time justifying my farming practices and trying to gain the confidence of my, of the upper management that I’m doing the right thing”.  “I am upper management and then there is ownership above that…ownership if they think that I have the best information they will accept it right away. They will send it out to the overall team and say this is what we are doing”. |
| **Teamwork and training in the vineyard** |
| “It’s one thing for all of us [decision-makers] to sit in a room and say this is how we combat leafroll, it’s another thing for that to…be…done out in the field....I could sit here all day long and say…we’re going to put out ant baits…pheromone traps…rogue, but…unless someone’s....physically putting them out there, making sure it happens, I can see that probably being the next biggest hurdle”.  “Our crews are really good if it’s flagged [marked]…they are very good about getting it out. I’ve worked other places where that’s not the case…[where] the vineyard manager is like ‘I don’t know what’s wrong, I pulled out all my red vines’, but it’s like did you actually walk through after the crew pulled them out? Because…I’ve worked other places where they leave half of them”.  “We’ve found it very effective for any host of problems or issues to make sure our entire team is as educated as they can be on signs and symptoms and bugs…and we’ve built a culture where they can share that information and…there is action taken on that…If we’ve got educated, empowered employees, all of a sudden it’s not myself and three viticultural staff looking at everything, we’ve got thirty people…looking at the plants all the time”.  “Even just yesterday, I was in the field with a grower. They had a block that everyone agreed was a very, very, important block. We had said before there are a few vines showing virus. They flagged them last year and chopped off the tops, but they hadn’t finished pulling them out. So they had sprouted out shoots all over the place, and then the vines next to them were starting to show symptoms. So that’s just an example of incomplete follow through with a decision that was made...and maybe the crew didn’t understand, they thought if they cut off the top, no problem...but because they all started pushing suckers and everything, they’re still a source of inoculum until you get them out of the ground and off the property”. |

Table 10. Example quotes for theme 8: regional cooperation.

| **Neighboring vineyards** |
| --- |
| “I’ve got a really good relationship with [my neighbor]…they put up some traps and they caught a couple mealybugs…and they applied some [insecticides] and he asked if I would be willing to apply [insecticides] if they paid for the products, and I completely understood his investment…and we try and be good neighbors…and I felt fine about it”.  “Sometimes you have neighbors that are not managing viruses at all, and you see constant spread from their border into your own…So all you have to do is play defense on that border. Sometimes I have growers that are right next to each other that really talk, and are all managing it the same way…that helps [the] area wide…situation”.  “We’re lucky to get our stuff replanted, let alone time it with our neighbors…I’m not gonna move [my block replant] up 10 years…because my neighbor wants to…line up with me”.  “it’s a hard thing to go over to your neighbor and tell them to pull their vineyard up, or that I think that you should manage your vineyard this way or that way”.  “We are fortunate that where we farm, we really have only two neighbors… Both…are customers of ours so it’s in their best interest [to jointly control vectors]”. |
| **Peer knowledge-sharing groups** |
| “[There groups are] great, because it opens up a conversation…It’s like pulling nails to get them to start talking about it. I think it’s important for neighbors to communicate between one another…it was good for them to sit down at one of those meetings and say ‘oh, we can coordinate when we replant and that will be much more effective”.  “There isn’t a lot of internal [industry] communication. They all know each other, but they don’t talk shop. It’s a great opportunity for them to focus on ‘Let’s discuss specific vineyard practices that might affect each other”; “…from my experience, sharing the different strategies, people seem to adopt them, more people are doing mating disruption. I’m sure the same thing was happening when roguing was first introduced as a strategy”.  “we’ve tried to hold grower meetings before on a regular basis and we end up with the same three or four people who show up to them all the time and the rest don’t. It’s a worthwhile endeavor, and we tried to do it and I wish it would be more effective than it is here”.  “[some groups were] mostly talking about different strategies. That would be great if there were more actual coordinated efforts such as…mating disruption in this area. It hasn’t quite gotten to coordination stage yet”.  “I would be hesitant to join a group where the jury is still out on the best practices”; “I think not yet, once the vectors are better understood then I think it could be helpful but until we know spread it’s kind of hard to kind of come together as a coalition”; “…they say in labs they have shown spread with TCAH but they haven’t been able to demonstrate it in the field. So, it’s hard for us…to have that actionable information if it hasn’t been proven. It’s too early”. |

Table. 11. Example quotes for theme 9: public policy instruments.

| **Nursery standards and regulation** |
| --- |
| Positive perceptions: "The regulations that are in place are doing what they are supposed to be doing…I believe they are limiting the amount of leafroll out there…it’s really up to the individual grower to be aware of what is happening in the nursery and with their plant material and to take a proactive approach”.  “We are diligent about visiting our nurseries…about selecting nurseries that we are comfortable with the material they are sending us…nurseries are obviously really concerned about [GLD] too. I think we’ve done a great job as an industry…getting [plant material] cleaned up”.  Negative perceptions: “So, I think…that certification ought to mean something. I don’t want to have a bunch of loopholes…the bar ought to be pretty high in my opinion”.  “I would just like to see them [nurseries] be more honest…to make [customers] aware that ‘hey this might have red blotch in it’. So, plant at your own risk”.  “I mean we don’t completely trust that [certified stock] anymore and..inspect everything that comes in…you feel a little bit better about certified, but it seems like there’s stuff that slips through”.  “We’re going away from buying nursery stocks. We’re using all of our own budwood now because we feel like we can control it better…and just not have to roll the dice as I feel it”  “we are…trying to have a good relationship with the nursery…there’s not that many [nurseries] out there and especially the bigger ones…they have the most options for us to get planting material”.  Nursery owner’s perspective: “I don’t know if there could be much more put in place from a regulatory perspective…Every nursery takes a little different approach…that caters towards their pressures…when you apply those blanket rules like they tried up in the northwest…[it can result in] a bunch of red blotch testing [where the resources might be] better used for testing leafroll...some common sense has to be applied…[for example] to test the higher-pressure areas and do less testing where there is really no reason to test. I like that flexibility…we are going to deliver the cleanest plants that way to our growers”.  Punitive solutions suggested: “[I would like] a certification program with teeth: with penalties, fines, license revocations…You have an extremely tiny pool of providers of nursery material. If you start a program that says we’re going to fine you and after your 3rd violation we will revoke your ability to sell certified material or anything that has any type of USDA stamp on it, I think it is going to whip people into shape very quickly”.  Cooperative solutions suggested: “There can be more money given to research and a lot more money poured into our certification program and oversight into the nurseries because they don’t have enough resources to make sure that their stuff is always squeaky clean”.  “I think that the nurseries need a farm advisor or a nursery adviser and…[a] nursery quality program that’s got teeth in it”.  “California Department of Food & Agriculture ought to have enough inspectors to do sampling at commercial nurseries, do their own testing and see whether they’re picking up anything. I get concerned that…more and more we’re on our own to do everything. And it’s a bigger job than individual growers can handle”.  “Just what is the standard they can set that is realistic for [virus] testing? Unless they are going to set up a national lab with subsidized funding for testing every single mother vine every year and the staff to do that. I don’t see what else we could do to support current testing efforts.”  “…there’s always a limited amount of dollars and resources so thinking that you could go out and clean up…all the [nursery] mother blocks everywhere is unrealistic, but we can at least get them clean at the foundation source, and then increase from there. That’s what’s so frustrating and discouraging about what happened at Russell Ranch. Big setback for the industry” |

(Table 11 continued)

| **Pesticide regulation** |
| --- |
| ““Some of the pesticide restrictions, like I get it why they do them…but the government is knocking out a lot of chemistries that work for mealybugs and other pests…really limiting the amounts of them that we can use. And we are not being really quick to get new chemistries on the market to supplement the ones that they are taking out”.  “…last year the EU decided that Applaud [buprofezin; insect growth regulator] was not acceptable and so this year if we wanted to export product into those countries, we can’t have that residue on our product”. |
| **Government assistance programs** |
| Federal subsidies: “I think the main [reason] why people aren’t…ripping out and replanting is it’s just too expensive. And we know how to manage it, we know how to deal with it…but if there was some financial incentive, I think people would definitely get on board with it".  “Something…we’ve done at least a dozen [times]…is that tree assistance program [TAP] for vineyards…The ability to replant and get money back has been pretty spectacular due to leafroll or red blotch…we’ve been able to replant 210 acres and received $600,000 to our clients [from the USDA]”  “…financial support on that larger grant level to help especially smaller [companies] is…key because…for them the capital expense can be tricky”.  “The TAP program…is very difficult to negotiate…really cumbersome and could be improved. That is a great incentive for removing a vineyard. They pay up to 70% of the cost of replanting…we tried it, but it’s really…difficult to jump through their hoops…you have to apply…across the entire ranch…rather than looking at it as a block by block problem…for those of us who are farming large acreages and we [just] want to get rid of some bad blocks [that] only adds up to 12%, you need a 15% minimum [across the ranch]”.  Local programs: “Where I worked previously…we actually came through the County and got some Anagyrus [mealybug parasitoid] bottles brought up to distribute…it was…really awesome that was available”  “An areawide pheromone program, either managed by neighbors or a community of farmers or…the county department of ag might be better. Where 100% vineyards are under pheromone confusion…it would drive down the [vine] mealybug population drastically. Then we could concentrate on just the hot spots and all of that combined would help reduce the spread of leafroll”; “…that’s why I mentioned the pheromone spray, because that’s organic and most people could use it but it would be very expensive so I feel like that would only really work…if the government was paying for it or if everyone was chipping in some money”. |
